# Supplementary material for: Perioperative outcomes after laparoscopic cholecystectomy in elderly patients: a systematic review and meta-analysis
Source: Surg Endosc. 2020 Jul 13;34(11):4727–40. doi: 10.1007/s00464-020-07805-z (PMC7572343; doi:10.1007/s00464-020-07805-z)
Supplement: Supplementary file 1 — (DOCX 2114 kb) [file 464_2020_7805_MOESM1_ESM.docx]

**Perioperative Outcomes after Laparoscopic Cholecystectomy in Elderly Patients: A Systematic Review and Meta-Analysis**

Sivesh K Kamarajah1, 2*, Santhosh Karri3*, James R Bundred3#, Richard PT Evans4, 5#, Aaron Lin3, Tania Kew3, Chinenye Ekeozor3, Susan L Powell 6, Pritam Singh7,8, Ewen A Griffiths4, 5

1. Department of Hepatobiliary, Pancreatic and Transplant Surgery, Freeman Hospital, Newcastle University NHS Foundation Trust Hospitals, Newcastle Upon Tyne, UK
2. Institute of Cellular Medicine, University of Newcastle, Newcastle Upon Tyne, UK
3. College of Medical and Dental Sciences, University of Birmingham, Birmingham, UK
4. Department of Upper Gastrointestinal Surgery, University Hospitals Birmingham NHS Foundation Trust, Birmingham, UK
5. Institute of Cancer and Genomic Sciences, College of Medical and Dental Sciences, University of Birmingham, UK
6. Department of Geriatric Medicine, Solihull **Hospital**, University Hospitals Birmingham NHS Foundation Trust, Birmingham, UK
7. Trent Oesophago-Gastric Unit, City Hospital Campus, Nottingham University Hospitals NHS Trust, Hucknall Road, Nottingham NG5 1PB, U.K.
8. **Regional Oesophago-Gastric Unit, Royal Surrey County Hospital NHS Foundation Trust, Egerton Road, Guildford, GU2 7XX**

* these authors contribute equally as co-first authors

# these authors contribute equally as co-second authors

**Corresponding Author Contact Details:**

Mr. Ewen A Griffiths,

Consultant Upper GI Surgeon,

Department of Upper Gastrointestinal Surgery,

Area 6, 7th Floor, Queen Elizabeth Hospital Birmingham,

Mindelsohn Way, Edgbaston, Birmingham

B15 2WB

Email: [ewen.griffiths@uhb.nhs.uk](mailto:ewen.griffiths@uhb.nhs.uk)

Telephone: 0121 3715886

Fax: 0121 371 5896

**Number of pages: 14**

**Word Count: 2931**

**Number of tables: 2**

**Number of figures: 3**

**Keywords:** cholecystectomy; elderly; outcomes; laparoscopic

Supplementary Table 1 Search terms in literature review

| 1 | cholecystectomy.ti,ab. | 67414 |
| --- | --- | --- |
| 2 | exp Treatment Outcome/ | 2360254 |
| 3 | complications.ti,ab. | 1765338 |
| 4 | exp INTRAOPERATIVE COMPLICATIONS/ or exp POSTOPERATIVE COMPLICATIONS/ | 1143356 |
| 5 | 2 or 3 or 4 | 4551783 |
| 6 | exp "aged, 80 and over"/ or exp frail elderly/ | 973162 |
| 7 | elderly.ti,ab. | 684607 |
| 8 | octogenarian.ti,ab. | 3375 |
| 9 | 6 or 7 or 8 | 1563007 |
| 10 | 1 and 5 and 9 | 3026 |

Supplementary Table 2 Baseline characteristics of included studies

| **Study Name** | **Region** | **Patients, n** | **Study Design** | **Indications** | | | | | | **Urgency** | | **Elderly Definition, years** | **Comparative Study** |
| --- | --- | --- | --- | --- | --- | --- | --- | --- | --- | --- | --- | --- | --- |
| **Biliary colic, n** | **Acute cholecystitis, n** | **Chronic cholecystitis, n** | **Gallstones, n** | **Gallstone pancreatitis, n** | **Others, n** | **Emergency** | **Elective** |
| Schreiber 197839 | USA | 39 | RCS | - | - | - | 39 | - | - | 39 |  | >60 | No |
| Loureiro 201140 | Brazil | 960 | RCS | - | 105 | 832 | - | - | 23 | - | - | >60 | No |
| Serban 201636 | Romania | 149 | RCS | - | 149 | - | - | - | - | - | - | >60 | No |
| Houghton 198541 | UK | 151 | PCS | - | - | - | - | - | - | 21 | 130 | >64 | No |
| Amato 201042 | Italy | 121 | RCS | - | 66 | - | 24 | 9 | 44 | - | - | >64 | No |
| Pigott 198843 | USA | 347 | RCS | - | - | - | - | - | - | - | - | >65 | No |
| Saxe 199344 | USA | 94 | RCS | - | - | - | - | - | - | - | - | >65 | No |
| Askew 199545 | Australia | 51 | RCS | - | - | - | 51 | - | - | - | - | >65 | No |
| Escarce 199546 | USA | 21131 | RCS | - | 7121 | 10692 | 63 | 1606 | 1649 | 13418 | 7713 | >65 | No |
| Lujan 199847 | Spain | 264 | RCS | - | - | - | 264 | - | - | - | - | >65 | No |
| Wang 200648 | Taiwan | 112 | RCS | - | 112 | - | - | - | - | - | - | >65 | No |
| Malik 200749 | Pakistan | 173 | RCS | - | - | - | 173 | - | - | - | - | >65 | No |
| Cheng 200850 | Taiwan | 287 | RCS | - | - | - | - | 15 | - | 19 | 268 | >65 | No |
| Lasithiotakis 201251 | Greece | 57 | **PCS** | - | - | 36 | 42 | - | 9 | 0 | 57 | >65 | No |
| Cull 201352 | USA | 265 | RCS | - | 264 | - | - | - | - | - | - | >65 | No |
| Ferrarese 201353 | Italy | 85 | RCS | - | - | - | - | - | - | 40 | 45 | >65 | No |
| Rao 201354 | USA | 15248 | RCS | - | - | - | - | - | - | - | - | >65 | No |
| Rubert 201655 | Brazil | 113 | RCS | - | - | - | - | - | - | - | - | >65 | No |
| Zeren 201756 | Turkey | 45 | RCS | - | - | - | 45 | - | - | - | - | >65 | No |
| Schlottmann 201829 | USA | 193, 339 | RCS | - | 193, 339 | - | - | - | - | - | - | >65 | No |
| Huber 198357 | USA | 93 | RCS | - | - | - | - | - | 93 | 43 | 50 | >70 | No |
| Margiotta 198858 | USA | 212 | RCS | - | 106 | 106 | - | - | - | 93 | 119 | >70 | No |
| Watemberg 199759 | Israel | 68 | RCS | - | - | - | - | - | - | 8 | 60 | >70 | No |
| Montori 200060 | Italy | 31 | RCS | - | - | - | - | - | - | 11 | 20 | >70 | No |
| Fisichella 200261 | Italy | 24 | RCS | - | - | - | - | - | 24 | 0 | 24 | >70 | No |
| Zappulla 200962 | Italy | 40 | RCS | 26 | 9 | - | - | - | 5 | - | - | >70 | No |
| Caglia 201263 | Italy | 50 | RCS | 36 | 10 | - | 50 | 4 | - | - | - | >70 | No |
| Aprea 201664 | Italy | 79 | RCS | - | - | - | - | - | - | - | - | >70 | No |
| Mastalerz 201865 | Poland | 114 | PCS | - | - | - | 105 | - | 37 | 0 | 114 | >70 | No |
| Decker 200166 | Belgium | 27 | RCS | - | 32 | - | - | - | - | 27 | 0 | >75 | No |
| Pessaux 200167 | France | 139 | PCS | - | 139 | - | - | - | - | - | - | >75 | No |
| Chau 200268 | Hong Kong | 296 | RCS | - | 296 | - | - | - | - | - | - | >75 | No |
| Coenye 200569 | Belgium | 20 | RCS | - | 20 | - | - | - | - | - | - | >75 | No |
| Moyson 200870 | Belgium | 100 | RCS | - | 100 | - | - | - | - | 85 | 15 | >75 | No |
| Maxwell 199871 | USA | 18500 | RCS | - | - | - | - | - | - | - | - | >80 | No |
| Uecker 200172 | USA | 44 | RCS | - | 27 | 8 | 22 | 12 | 1 | 28 | 16 | >80 | No |
| Arthur 20039 | UK | 23 | RCS | - | - | - | - | - | - | 6 | 17 | >80 | No |
| Hazzan 200373 | Israel | 67 | RCS | 29 | 15 | - | - | 17 | 6 | - | - | >80 | No |
| Tambyraja 200474 | UK | 117 | RCS | - | 28 | 62 | 14 | 12 | 8 | 39 | 78 | >80 | No |
| Tambyraja 200575 | UK | 76 | RCS | - | 16 | 43 | 1 | 7 | 3 | 18 | 58 | >80 | No |
| Leandros 200776 | Greece | 92 | RCS | 41 | 29 | - | - | 14 | 8 | 29 | 63 | >80 | No |
| Marcari 201277 | Brazil | 42 | RCS | 4 | - | 23 | - | 15 | - | 0 | 42 | >80 | No |
| Lupinacci 201378 | Brazil | 81 | RCS | - | 30 | 22 | - | - | 29 | 30 | 51 | >80 | No |
| Wiggins 201879 | UK | 3539 | RCS | - | 3539 | - | - | - | - | - | - | >80 | No |
| Dubecz 201280 | Germany | 22 | RCS | - | 1331 | - | - | - | 1678 | 20 | 2 | >90 | No |
| Irojah 201781 | USA | 1007 | RCS | - | - | - | - | - | - | 200 | 807 | >90 | No |
| Mayol 199782 | Spain | 158 | RCS | 116 | 32 | - | - | 10 | - | - | - | >60 | Yes |
| Yetim 201083 | Turkey | 146 | RCS | - | 22 | - | 121 | - | 3 | - | - | >60 | Yes |
| Nazeer 201284 | Pakistan | 200 | RCS | - | - | - | 200 | - | - | - | - | >60 | Yes |
| Bhandari 201785 | Nepal | 242 | RCS | 126 | 15 | - | 6 | 8 | 87 | - | - | >60 | Yes |
| Ekici 201886 | Turkey | 665 | RCS | - | 579 | - | - | - | 86 | - | - | >60 | Yes |
| Rey 199587 | Japan | 364 | RCS | - | - | - | - | - | - | - | - | >65 | Yes |
| Firilas 199688 | USA | 194 | RCS | 11 | 15 | - | - | 14 | 48 | - | - | >65 | Yes |
| Lo 199689 | Hong Kong | 70 | RCS | - | 70 | - | - | - | - | 70 | 0 | >65 | Yes |
| Tagle 199790 | USA | 99 | RCS | 55 | 22 | - | 3 | 10 | - | - | - | >65 | Yes |
| Brunt 200191 | USA | 421 | RCS | 312 | 63 | - | - | 39 | 1 | 31 | 390 | >65 | Yes |
| Bingener 200310 | USA | 5884 | RCS | 173 | 73 | - | - | - | 54 | - | - | >65 | Yes |
| Majeski 200492 | USA | 239 | RCS | - | - | - | - | - | - | 22 | 217 | >65 | Yes |
| Annamaneni 200593 | USA | 46 | RCS | - | 15 | - | - | 4 | - | 30 | 16 | >65 | Yes |
| Kauvar 200594 | USA | 315 | RCS | - | 58 | 27 | - | - | 230 | 58 | 257 | >65 | Yes |
| do Amaral 200695 | Brazil | 190 | RCS | - | 190 | - | - | - | - | - | - | >65 | Yes |
| Kwon 200696 | Japan | 516 | RCS | - | 66 | - | - | - | 605 | 14 | 502 | >65 | Yes |
| Kaya 200897 | USA | 1992 | RCS | - | - | - | - | - | 1916 | - | - | >65 | Yes |
| Osman 200898 | Turkey | 286 | RCS | - | - | - | 286 | - | - | - | - | >65 | Yes |
| Chang 200999 | Taiwan | 627 | RCS | - | 84 | - | 544 | - | - | - | - | >65 | Yes |
| Kim 2009100 | South Korea | 388 | RCS | - | - | - | - | - | - | - | - | >65 | Yes |
| Cui 2010101 | China | 4048 | RCS | - | - | - | - | - | - | - | - | >65 | Yes |
| Yetim 2010102 | Turkey | 511 | RCS | - | 51 | - | 455 | - | 1 | - | - | >65 | Yes |
| Tucker 2011103 | USA | 23852 | RCS | - | 19082 | - | 4770 | - | - | 2159 | 21693 | >65 | Yes |
| Qasaimeh 2012104 | Jordan | 1539 | RCS | 1266 | 158 | - | - | 36 | 79 | 158 | 1381 | >65 | Yes |
| Agrusa 2014105 | Italy | 1227 | RCS | NR | NR | - | - | NR | NR | 230 | 997 | >65 | Yes |
| Nielsen 2014106 | Denmark | 14, 417 | RCS | - | - | - | 69 | - | 665 | - | - | >65 | Yes |
| Teixeira 2014107 | Portugal | 249 | RCS | - | 249 | - | - | - | - | - | - | >65 | Yes |
| Zhao 2015108 | China | 112 | RCS | - | - | - | 98 | - | 28 | - | - | >65 | Yes |
| Rizzuto 2016109 | Germany | 355 | RCS | - | - | - | 355 | - | - | 12 | 343 | >65 | Yes |
| Ido 1995110 | Japan | 712 | RCS | - | - | - | - | - | - | - | - | >70 | Yes |
| Paganini 2002111 | Italy | 284 | RCS | 266 | 3 | - | - | 93 | 269 | 0 | 284 | >70 | Yes |
| Yetkin 200912 | Turkey | 595 | RCS | - | - | - | - | - | - | - | - | >70 | Yes |
| Fujikawa 2012112 | Japan | 111 | RCS | - | 111 | - | - | - | - | - | - | >70 | Yes |
| Ambe 2015113 | Germany | 152 | RCS | - | 152 | - | - | - | - | - | - | >70 | Yes |
| Pessaux 2000114 | France | 863 | PCS | - | - | - | 863 | - | - | - | - | >75 | Yes |
| Kirshtein 2008115 | Israel | 1216 | RCS | - | 225 | 58 | - | - | - | - | - | >75 | Yes |
| Polychronidis 2008116 | Greece | 2412 | RCS | - | - | - | - | - | - | 315 | 2097 | >75 | Yes |
| Su 2009117 | Taiwan | 56 | RCS | - | 56 | - | - | - | - | - | - | >75 | Yes |
| Lill 2011118 | Finland | 240 | RCS | 81 | - | - | - | - | 159 | 0 | 240 | >75 | Yes |
| Fuks 2015119 | France | 414 | RCS | - | 414 | - | - | - | - | - | - | >75 | Yes |
| Maxwell 1998120 | USA | 315 | RCS | - | - | - | - | - | - | 22 | 293 | >80 | Yes |
| Costi 2007121 | Italy | 160 | RCS | - | - | - | - | - | 160 | - | - | >80 | Yes |
| Pavlidis 2008122 | Greece | 1263 | RCS | 13 | 2 | - | - | 4 | 2 | - | - | >80 | Yes |
| Leardi 2009123 | Italy | 341 | RCS | - | 138 | - | - | - | 203 | - | - | >80 | Yes |
| Lee 2013124 | Korea | 380 | RCS | - | 73 | 307 | 31 | 19 | 18 | - | - | >80 | Yes |
| Mauro 2014125 | UK | 131 | RCS | - | - | - | 131 | - | - | 0 | 131 | >80 | Yes |
| Peker 2014126 | Turkey | 296 | RCS | - | 24 | - | 254 | 18 | - | 11 | 285 | >80 | Yes |
| Lee 2015127 | Korea | 302 | RCS | - | 302 | - | - | - | - | - | - | >80 | Yes |
| Palsson 2016128 | Sweden | 1961 | RCS | 630 | 1248 | - | - | 263 | 703 | - | - | >80 | Yes |
| Wakasugi 2017129 | Japan | 810 | RCS | - | - | - | - | - | - | - | - | >80 | Yes |
| Novello 2018130 | Italy | 355 | RCS | - | 55 | - | 106 | - | 233 | 191 | 164 | >80 | Yes |
| Yokota 2018131 | Japan | 351 | RCS | - | 351 | - | - | - | - | - | - | >80 | Yes |
| Priego 2014132 | USA | 2035 | RCS | - | - | - | - | - | - | 0 | 2035 | >85 | Yes |

*Abbreviations: PCS - Prospective cohort study, RCS - Retrospective cohort study, UK - United Kingdom, USA - United States of America*

Supplementary Table 3 Summary of Quality assessment of included studies

| **Study Name** | **Region** | **Baseline Confounding** | **Selection of participants** | **Classification of interventions** | **Deviation from intended interventions** | **Missing data** | **Measurement of outcomes** | **Selection of reported results** | **Overall risk of bias** |
| --- | --- | --- | --- | --- | --- | --- | --- | --- | --- |
| Schreiber 197839 | USA | **Low** | **Moderate** | **Low** | **Low** | **Moderate** | **Low** | **Low** | **Low** |
| Loureiro 201140 | Brazil | **Low** | **Low** | **Low** | **Low** | **Low** | **Low** | **Low** | **Low** |
| Serban 201636 | Romania | **Low** | **Low** | **Low** | **Low** | **Low** | **Low** | **Low** | **Low** |
| Houghton 198541 | UK | **Severe** | **Low** | **Low** | **Low** | **Low** | **Low** | **Moderate** | **Moderate** |
| Amato 201042 | Italy | **Moderate** | **Low** | **Low** | **Low** | **Low** | **Low** | **Low** | **Low** |
| Pigott 198843 | USA | **Moderate** | **Low** | **Low** | **Low** | **Low** | **Moderate** | **Low** | **Low** |
| Saxe 199344 | USA | **Moderate** | **Moderate** | **Low** | **Low** | **Low** | **Low** | **Low** | **Low** |
| Askew 199545 | Australia | **Severe** | **Low** | **Low** | **Low** | **Low** | **Low** | **Low** | **Moderate** |
| Escarce 199546 | USA | **Low** | **Moderate** | **Low** | **Low** | **Low** | **Moderate** | **Low** | **Moderate** |
| Lujan 199847 | Spain | **Low** | **Low** | **Low** | **Low** | **Low** | **Low** | **Low** | **Low** |
| Wang 200648 | Taiwan | **Low** | **Low** | **Low** | **Low** | **Low** | **Low** | **Low** | **Low** |
| Malik 200749 | Pakistan | **Low** | **Low** | **Low** | **Low** | **Low** | **Low** | **Low** | **Low** |
| Cheng 200850 | Taiwan | **Low** | **Moderate** | **Low** | **Low** | **Moderate** | **Low** | **Moderate** | **Moderate** |
| Lasithiotakis 201251 | Greece | **Low** | **Moderate** | **Low** | **Low** | **Low** | **Low** | **Low** | **Low** |
| Cull 201352 | USA | **Low** | **Low** | **Low** | **Low** | **Low** | **Low** | **Low** | **Low** |
| Ferrarese 201353 | Italy | **Moderate** | **Moderate** | **Low** | **Low** | **Low** | **Low** | **Low** | **Moderate** |
| Rao 201354 | USA | **Low** | **Low** | **Low** | **Low** | **Low** | **Low** | **Low** | **Low** |
| Rubert 201655 | Brazil | **Moderate** | **Moderate** | **Low** | **Low** | **Low** | **Low** | **Low** | **Low** |
| Zeren 201756 | Turkey | **Low** | **Moderate** | **Low** | **Low** | **Low** | **Low** | **Low** | **Low** |
| Schlottmann 201829 | USA | **Low** | **Moderate** | **Low** | **Low** | **Low** | **Moderate** | **Low** | **Low** |
| Huber 198357 | USA | **Severe** | **Moderate** | **Low** | **Low** | **Low** | **Low** | **Low** | **Moderate** |
| Margiotta 198858 | USA | **Severe** | **Low** | **Low** | **Low** | **Low** | **Low** | **Low** | **Moderate** |
| Watemberg 199759 | Israel | **Severe** | **Moderate** | **Low** | **Low** | **Low** | **Low** | **Low** | **Moderate** |
| Montori 200060 | Italy | **Severe** | **Low** | **Low** | **Low** | **Low** | **Moderate** | **Low** | **Moderate** |
| Fisichella 200261 | Italy | **Moderate** | **Low** | **Low** | **Low** | **Low** | **Low** | **Low** | **Moderate** |
| Zappulla 200962 | Italy | **Low** | **Low** | **Low** | **Low** | **Low** | **Low** | **Low** | **Low** |
| Caglia 201263 | Italy | **Low** | **Low** | **Low** | **Low** | **Low** | **Low** | **Low** | **Low** |
| Aprea 201664 | Italy | **Low** | **Severe** | **Low** | **Low** | **Low** | **Low** | **Low** | **Moderate** |
| Mastalerz 201865 | Poland | **Low** | **Moderate** | **Low** | **Low** | **Moderate** | **Low** | **Low** | **Low** |
| Decker 200166 | Belgium | **Moderate** | **Low** | **Low** | **Low** | **Low** | **Low** | **Low** | **Low** |
| Pessaux 200167 | France | **Low** | **Low** | **Low** | **Low** | **Low** | **Low** | **Severe** | **Moderate** |
| Chau 200268 | Hong Kong | **Low** | **Low** | **Low** | **Low** | **Low** | **Low** | **Low** | **Low** |
| Coenye 200569 | Belgium | **Moderate** | **Low** | **Low** | **Moderate** | **Low** | **Low** | **Low** | **Low** |
| Moyson 200870 | Belgium | **Moderate** | **Low** | **Low** | **Low** | **Low** | **Low** | **Low** | **Low** |
| Maxwell 199871 | USA | **Severe** | **Low** | **Low** | **Low** | **Low** | **Moderate** | **Low** | **Moderate** |
| Uecker 200172 | USA | **Low** | **Low** | **Low** | **Low** | **Low** | **Low** | **Low** | **Low** |
| Arthur 20039 | UK | **Severe** | **Low** | **Low** | **Low** | **Low** | **Low** | **Low** | **Moderate** |
| Hazzan 200373 | Israel | **Moderate** | **Low** | **Low** | **Low** | **Low** | **Low** | **Low** | **Low** |
| Tambyraja 200474 | UK | **Moderate** | **Low** | **Low** | **Low** | **Low** | **Low** | **Low** | **Low** |
| Tambyraja 200575 | UK | **Moderate** | **Low** | **Low** | **Low** | **Low** | **Low** | **Low** | **Low** |
| Leandros 200776 | Greece | **Low** | **Low** | **Low** | **Low** | **Low** | **Low** | **Low** | **Low** |
| Marcari 201277 | Brazil | **Moderate** | **Low** | **Low** | **Low** | **Low** | **Low** | **Low** | **Low** |
| Lupinacci 201378 | Brazil | **Low** | **Low** | **Low** | **Low** | **Low** | **Low** | **Low** | **Low** |
| Wiggins 201879 | UK | **Severe** | **Moderate** | **Low** | **Low** | **Low** | **Low** | **Low** | **Moderate** |
| Dubecz 201280 | Germany | **Low** | **Low** | **Low** | **Low** | **Severe** | **Low** | **Low** | **Moderate** |
| Irojah 201781 | USA | **Moderate** | **Low** | **Low** | **Low** | **Low** | **Moderate** | **Low** | **Low** |
| Mayol 199782 | Spain | **Moderate** | **Moderate** | **Low** | **Low** | **Low** | **Low** | **Low** | **Low** |
| Yetim 201083 | Turkey | **Low** | **Low** | **Low** | **Low** | **Low** | **Low** | **Low** | **Low** |
| Nazeer 201284 | Pakistan | **Moderate** | **Severe** | **Low** | **Low** | **Low** | **Low** | **Low** | **Moderate** |
| Bhandari 201785 | Nepal | **Low** | **Low** | **Low** | **Low** | **Low** | **Low** | **Low** | **Low** |
| Ekici 201886 | Turkey | **Low** | **Low** | **Low** | **Low** | **Low** | **Low** | **Low** | **Low** |
| Rey 199587 | Japan | **Moderate** | **Low** | **Low** | **Low** | **Low** | **Low** | **Low** | **Low** |
| Firilas 199688 | USA | **Moderate** | **Low** | **Low** | **Low** | **Low** | **Low** | **Low** | **Low** |
| Lo 199689 | Hong Kong | **Low** | **Moderate** | **Low** | **Low** | **Low** | **Low** | **Low** | **Low** |
| Tagle 199790 | USA | **Moderate** | **Low** | **Low** | **Low** | **Low** | **Low** | **Low** | **Low** |
| Brunt 200191 | USA | **Moderate** | **Low** | **Low** | **Low** | **Low** | **Low** | **Low** | **Low** |
| Bingener 200310 | USA | **Moderate** | **Low** | **Low** | **Low** | **Low** | **Low** | **Low** | **Low** |
| Majeski 200492 | USA | **Moderate** | **Low** | **Low** | **Low** | **Low** | **Low** | **Low** | **Low** |
| Annamaneni 200593 | USA | **Low** | **Low** | **Low** | **Low** | **Low** | **Low** | **Low** | **Low** |
| Kauvar 200594 | USA | **Moderate** | **Low** | **Low** | **Low** | **Low** | **Low** | **Low** | **Low** |
| do Amaral 200695 | Brazil | **Low** | **Moderate** | **Low** | **Low** | **Low** | **Low** | **Low** | **Low** |
| Kwon 200696 | Japan | **Low** | **Low** | **Low** | **Low** | **Low** | **Low** | **Severe** | **Moderate** |
| Kaya 200897 | USA | **Severe** | **Low** | **Low** | **Low** | **Low** | **Low** | **Low** | **Moderate** |
| Osman 200898 | Turkey | **Low** | **Moderate** | **Low** | **Low** | **Low** | **Low** | **Low** | **Low** |
| Chang 200999 | Taiwan | **Low** | **Low** | **Moderate** | **Moderate** | **Moderate** | **Moderate** | **Moderate** | **Moderate** |
| Kim 2009100 | South Korea | **Low** | **Low** | **Low** | **Low** | **Low** | **Low** | **Low** | **Low** |
| Cui 2010101 | China | **Low** | **Moderate** | **Low** | **Low** | **Low** | **Low** | **Low** | **Low** |
| Yetim 2010102 | Turkey | **Low** | **Low** | **Low** | **Low** | **Low** | **Low** | **Low** | **Low** |
| Tucker 2011103 | USA | **Low** | **Moderate** | **Low** | **Low** | **Low** | **Low** | **Low** | **Low** |
| Qasaimeh 2012104 | Jordan | **Low** | **Moderate** | **Low** | **Low** | **Low** | **Low** | **Low** | **Low** |
| Agrusa 2014105 | Italy | **Low** | **Moderate** | **Low** | **Low** | **Low** | **Low** | **Low** | **Low** |
| Nielsen 2014106 | Denmark | **Low** | **Low** | **Low** | **Low** | **Low** | **Low** | **Low** | **Low** |
| Teixeira 2014107 | Portugal | **Moderate** | **Low** | **Low** | **Low** | **Low** | **Low** | **Low** | **Low** |
| Zhao 2015108 | China | **Low** | **Severe** | **Low** | **Low** | **Low** | **Low** | **Low** | **Moderate** |
| Rizzuto 2016109 | Germany | **Moderate** | **Moderate** | **Low** | **Low** | **Low** | **Low** | **Low** | **Low** |
| Ido 1995110 | Japan | **Low** | **Low** | **Low** | **Low** | **Low** | **Low** | **Moderate** | **Low** |
| Paganini 2002111 | Italy | **Low** | **Low** | **Low** | **Low** | **Low** | **Low** | **Low** | **Low** |
| Yetkin 200912 | Turkey | **Moderate** | **Low** | **Low** | **Low** | **Low** | **Low** | **Low** | **Low** |
| Fujikawa 2012112 | Japan | **Low** | **Moderate** | **Low** | **Low** | **Low** | **Low** | **Low** | **Low** |
| Ambe 2015113 | Germany | **Low** | **Low** | **Low** | **Low** | **Low** | **Low** | **Low** | **Low** |
| Pessaux 2000114 | France | **Moderate** | **Low** | **Low** | **Low** | **Low** | **Low** | **Low** | **Low** |
| Kirshtein 2008115 | Israel | **Low** | **Low** | **Low** | **Low** | **Low** | **Low** | **Low** | **Low** |
| Polychronidis 2008116 | Greece | **Low** | **Low** | **Low** | **Low** | **Low** | **Low** | **Low** | **Low** |
| Su 2009117 | Taiwan | **Low** | **Low** | **Low** | **Low** | **Low** | **Low** | **Low** | **Low** |
| Lill 2011118 | Finland | **Low** | **Low** | **Low** | **Low** | **Low** | **Low** | **Low** | **Low** |
| Fuks 2015119 | France | **Low** | **Low** | **Low** | **Low** | **Low** | **Low** | **Low** | **Low** |
| Maxwell 1998120 | USA | **Moderate** | **Low** | **Low** | **Low** | **Low** | **Low** | **Low** | **Low** |
| Costi 2007121 | Italy | **Moderate** | **Moderate** | **Low** | **Low** | **Low** | **Low** | **Moderate** | **Moderate** |
| Pavlidis 2008122 | Greece | **Low** | **Low** | **Low** | **Low** | **Low** | **Low** | **Low** | **Low** |
| Leardi 2009123 | Italy | **Moderate** | **Low** | **Low** | **Low** | **Low** | **Low** | **Low** | **Low** |
| Lee 2013124 | Korea | **Low** | **Low** | **Low** | **Low** | **Low** | **Low** | **Low** | **Low** |
| Mauro 2014125 | UK | **Low** | **Moderate** | **Low** | **Low** | **Low** | **Low** | **Low** | **Low** |
| Peker 2014126 | Turkey | **Low** | **Low** | **Low** | **Low** | **Low** | **Low** | **Low** | **Low** |
| Lee 2015127 | Korea | **Low** | **Moderate** | **Low** | **Low** | **Low** | **Low** | **Low** | **Low** |
| Palsson 2016128 | Sweden | **Low** | **Low** | **Low** | **Low** | **Low** | **Low** | **Low** | **Low** |
| Wakasugi 2017129 | Japan | **Low** | **Moderate** | **Low** | **Low** | **Low** | **Low** | **Moderate** | **Low** |
| Novello 2018130 | Italy | **Low** | **Moderate** | **Low** | **Low** | **Low** | **Low** | **Low** | **Low** |
| Yokota 2018131 | Japan | **Low** | **Moderate** | **Low** | **Low** | **Low** | **Low** | **Low** | **Low** |
| Priego 2014132 | USA | **Moderate** | **Moderate** | **Low** | **Low** | **Low** | **Low** | **Low** | **Low** |

*Abbreviations: UK - United Kingdom, USA - United States of America*

**Supplementary Figure 1 Impact of age on overall complications in patients**

**undergoing laparoscopic cholecystectomy**

**Supplementary Figure 2 Impact of age on major complications in patients**

**undergoing laparoscopic cholecystectomy**

**Supplementary Figure 3 Impact of age cut-offs on major complications in patients undergoing laparoscopic cholecystectomy (A) ≥65 years (B) ≥70 years (C) ≥75 years (D) ≥80 years**

**Supplementary Figure 4 Impact of age on conversion to open in patients**

**undergoing laparoscopic cholecystectomy**

**Supplementary Figure 5 Impact of age cut-offs on conversion to open in patients undergoing laparoscopic cholecystectomy (A) ≥60 years (B) ≥65 years (C) ≥70 years (D) ≥75 years (E) ≥80 years**

**Supplementary Figure 6 Impact of age on bile leaks in patients undergoing**

**laparoscopic cholecystectomy**

**Supplementary Figure 7 Impact of age cut-offs on bile leaks in patients undergoing laparoscopic cholecystectomy (A) ≥60 years (B) ≥65 years (C) ≥70 years (D) ≥75 years (E) ≥80 years**

**Supplementary Figure 8 Impact of age on postoperative mortality in patients**

**undergoing laparoscopic cholecystectomy**

**Supplementary Figure 9 Impact of age on length of stay in patients undergoing**

**laparoscopic cholecystectomy**

**Supplementary Figure 10 Impact of age cut-offs on length of stay in patients**

**undergoing laparoscopic cholecystectomy (A) ≥65 years (B) ≥70 years (C) ≥75**

**years (D) ≥80 years**

**Supplementary Figure 11 Funnel plot on the impact of age on major**

**complications in patients undergoing laparoscopic cholecystectomy**

**Supplementary Figure 12 Funnel plot on the impact of age on conversion to**

**open in patients undergoing laparoscopic cholecystectomy**

**Supplementary Figure 13 Funnel plot on the impact of age on bile leaks in**

**patients undergoing laparoscopic cholecystectomy**

**Supplementary Figure 14 Funnel plot on the impact of age on postoperative**

**mortality in patients undergoing laparoscopic cholecystectomy**

**Supplementary Figure 15 Funnel plot on the impact of age on length of stay in**

**patients undergoing laparoscopic cholecystectomy**

**Supplementary Figure 16 Funnel plot on the impact of age on overall**

**complications in patients undergoing laparoscopic cholecystectomy**
